# Supplementary material
Source: PubMed Central journal article supplement (PMC2832952)
Supplement: supp_M109.098665_jbc.M109.098665-2.pdf [file supp_M109.098665_jbc.M109.098665-2.pdf]

## Supplemental data

**Supplemental Data 1. Expression of annexin 1 is localized in lamellipodia during cell movement/crawling.** HUVECs were electroporated with EGFP-ANXA1 wild-type and were plated on gelatin-coated 35mm glass bottom microwell dishes. After 24h, the cells were made quiescent by serum starvation for 16-20 hours. Thereafter, images of green cells were taken every 4 minutes during 6 hours using the time-lapse imaging VivaView LCV110U system equipped with 40X objective. Cells were left untreated for the first three hours before adding VEGF (5 ng/ml). Arrows shows example of localization of annexin 1 in ruffles.
